# Supplementary material
Source: PubMed Central journal article supplement (PMC4313251)
Supplement: JCM.02438-14_zjm999093806so1.pdf [file JCM.02438-14_zjm999093806so1.pdf]

**Supplemental table 1.** Genotypic and phenotypic PZA DST results of isolates from the NC-002 (TB-Alliance) trial.

| Sample number | Phenotypic PZA resistance (MGIT) | Time to obtain DST result (days) | Genotypic PZA resistance |                      |                             |                            |
|---------------|----------------------------------|----------------------------------|--------------------------|----------------------|-----------------------------|----------------------------|
|               |                                  |                                  | PCR result               | SNPs/Del/Ins (codon) | Amino Acid change           | Genotypic PZA resistance   |
| 290           | Resistant                        | not available                    | Positive                 | 173 G Insert         | out of frame from codon 173 | Resistant                  |
| 716           | Resistant                        | 33                               | Positive                 | 173 G Insert         | out of frame from codon 173 | Resistant                  |
| 420           | Resistant                        | 64                               | Positive                 | 9-bp Del at 113      | out of frame from codon 113 | Resistant                  |
| 963           | Resistant                        | 28                               | Positive                 | 9-bp Del at 113      | out of frame from codon 113 | Resistant                  |
| 1234          | Resistant                        | not available                    | Positive                 | A Del at 22          | out of frame from codon 22  | Resistant                  |
| 898           | Resistant                        | 15                               | Positive                 | GAC8CAC              | N8H                         | Resistant                  |
| 347           | Resistant                        | 24                               | Positive                 | GAG15GAA; TAC103TAG  | E15E, Y103*                 | Resistant                  |
| 56            | Resistant                        | 37                               | Positive                 | TAC103TAG            | Y103*                       | Resistant                  |
| 439           | Resistant                        | 32                               | Positive                 | TAC103TAG            | Y103*                       | Resistant                  |
| 1290          | Resistant                        | 54                               | Positive                 | TAC103TAG            | Y103*                       | Resistant                  |
| 1412          | Resistant                        | 42                               | Positive                 | Wild Type            |                             | Sensitive                  |
| 41            | Resistant                        | 43                               | Negative                 |                      |                             |                            |
| 1104          | Resistant                        | not available                    | Negative                 |                      |                             |                            |
| 885           | Sensitive                        | 170                              | Positive                 | ACG114ATG            | T114M                       | Low level Resistance (1)   |
| 1080          | Sensitive                        | 36                               | Positive                 | CTG35CGG             | L35R                        | Low level Resistance (2-4) |
| 1622          | Sensitive                        | 23                               | Positive                 | GTG130GCG            | V130A                       | Low level Resistance (5)   |
| 2025          | Sensitive                        | 29                               | Positive                 | GTG130GCG            | V130A                       | Low level Resistance (5)   |
| 1081          | Sensitive                        | 15                               | Positive                 | GAC12GAT             | N12N                        | Sensitive                  |
| 2039          | Sensitive                        | 21                               | Positive                 | TCC65TCT             | S65S                        | Sensitive                  |
| 7             | Sensitive                        | 13                               | Positive                 | Wild Type            |                             | Sensitive                  |
| 384           | Sensitive                        | 26                               | Positive                 | Wild Type            |                             | Sensitive                  |
| 412           | Sensitive                        | 12                               | Positive                 | Wild Type            |                             | Sensitive                  |
| 449           | Sensitive                        | 14                               | Positive                 | Wild Type            |                             | Sensitive                  |
| 462           | Sensitive                        | 13                               | Positive                 | Wild Type            |                             | Sensitive                  |
| 492           | Sensitive                        | 12                               | Positive                 | Wild Type            |                             | Sensitive                  |
| 514           | Sensitive                        | 23                               | Positive                 | Wild Type            |                             | Sensitive                  |
| 644           | Sensitive                        | 14                               | Positive                 | Wild Type            |                             | Sensitive                  |
| 662           | Sensitive                        | 23                               | Positive                 | Wild Type            |                             | Sensitive                  |
| 664           | Sensitive                        | 17                               | Positive                 | Wild Type            |                             | Sensitive                  |
| 691           | Sensitive                        | 23                               | Positive                 | Wild Type            |                             | Sensitive                  |

|      |           |     |          |           |           |
|------|-----------|-----|----------|-----------|-----------|
| 694  | Sensitive | 12  | Positive | Wild Type | Sensitive |
| 698  | Sensitive | 12  | Positive | Wild Type | Sensitive |
| 718  | Sensitive | 195 | Positive | Wild Type | Sensitive |
| 724  | Sensitive | 49  | Positive | Wild Type | Sensitive |
| 736  | Sensitive | 35  | Positive | Wild Type | Sensitive |
| 859  | Sensitive | 18  | Positive | Wild Type | Sensitive |
| 886  | Sensitive | 14  | Positive | Wild Type | Sensitive |
| 947  | Sensitive | 14  | Positive | Wild Type | Sensitive |
| 965  | Sensitive | 19  | Positive | Wild Type | Sensitive |
| 977  | Sensitive | 19  | Positive | Wild Type | Sensitive |
| 979  | Sensitive | 29  | Positive | Wild Type | Sensitive |
| 1003 | Sensitive | 28  | Positive | Wild Type | Sensitive |
| 1060 | Sensitive | 15  | Positive | Wild Type | Sensitive |
| 1130 | Sensitive | 23  | Positive | Wild Type | Sensitive |
| 1163 | Sensitive | 16  | Positive | Wild Type | Sensitive |
| 1284 | Sensitive | 15  | Positive | Wild Type | Sensitive |
| 1287 | Sensitive | 15  | Positive | Wild Type | Sensitive |
| 1293 | Sensitive | 21  | Positive | Wild Type | Sensitive |
| 1308 | Sensitive | 14  | Positive | Wild Type | Sensitive |
| 1310 | Sensitive | 14  | Positive | Wild Type | Sensitive |
| 1317 | Sensitive | 14  | Positive | Wild Type | Sensitive |
| 1323 | Sensitive | 15  | Positive | Wild Type | Sensitive |
| 1325 | Sensitive | 21  | Positive | Wild Type | Sensitive |
| 1399 | Sensitive | 17  | Positive | Wild Type | Sensitive |
| 1410 | Sensitive | 15  | Positive | Wild Type | Sensitive |
| 1435 | Sensitive | 15  | Positive | Wild Type | Sensitive |
| 1442 | Sensitive | 16  | Positive | Wild Type | Sensitive |
| 1448 | Sensitive | 22  | Positive | Wild Type | Sensitive |
| 1524 | Sensitive | 20  | Positive | Wild Type | Sensitive |
| 1568 | Sensitive | 13  | Positive | Wild Type | Sensitive |
| 1618 | Sensitive | 14  | Positive | Wild Type | Sensitive |
| 1620 | Sensitive | 15  | Positive | Wild Type | Sensitive |
| 1663 | Sensitive | 13  | Positive | Wild Type | Sensitive |
| 1674 | Sensitive | 16  | Positive | Wild Type | Sensitive |
| 1680 | Sensitive | 17  | Positive | Wild Type | Sensitive |
| 1691 | Sensitive | 19  | Positive | Wild Type | Sensitive |

|      |           |    |          |           |           |
|------|-----------|----|----------|-----------|-----------|
| 1740 | Sensitive | 12 | Positive | Wild Type | Sensitive |
| 1782 | Sensitive | 22 | Positive | Wild Type | Sensitive |
| 1880 | Sensitive | 40 | Positive | Wild Type | Sensitive |
| 1891 | Sensitive | 29 | Positive | Wild Type | Sensitive |
| 1906 | Sensitive | 40 | Positive | Wild Type | Sensitive |
| 1910 | Sensitive | 15 | Positive | Wild Type | Sensitive |
| 1912 | Sensitive | 27 | Positive | Wild Type | Sensitive |
| 1952 | Sensitive | 31 | Positive | Wild Type | Sensitive |
| 1982 | Sensitive | 12 | Positive | Wild Type | Sensitive |
| 1984 | Sensitive | 12 | Positive | Wild Type | Sensitive |
| 2021 | Sensitive | 22 | Positive | Wild Type | Sensitive |
| 2034 | Sensitive | 24 | Positive | Wild Type | Sensitive |
| 2083 | Sensitive | 25 | Positive | Wild Type | Sensitive |
| 2087 | Sensitive | 26 | Positive | Wild Type | Sensitive |
| 643  | Sensitive | 14 | Negative |           |           |
| 1083 | Sensitive | 13 | Negative |           |           |
| 1379 | Sensitive | 16 | Negative |           |           |
| 1450 | Sensitive | 15 | Negative |           |           |
| 1893 | Sensitive | 40 | Negative |           |           |

---

\* Stop codon.

## References.

1. **Louw, G. E., R. M. Warren, P. R. Donald, M. B. Murray, M. Bosman, P. D. van Helden, D. B. Young, and T. C. Victor.** 2006. Frequency and implications of pyrazinamide resistance in managing previously treated tuberculosis patients. *Int J.Tuberc.Lung Dis.* **10**:802-807.
2. **Cui, Z., J. Wang, J. Lu, X. Huang, R. Zheng, and Z. Hu.** 2013. Evaluation of methods for testing the susceptibility of clinical *Mycobacterium tuberculosis* isolates to pyrazinamide. *J.Clin.Microbiol.* **51**:1374-1380.
3. **Huang, T. S., S. S. Lee, H. Z. Tu, W. K. Huang, Y. S. Chen, C. K. Huang, S. R. Wann, H. H. Lin, and Y. C. Liu.** 2003. Correlation between pyrazinamide activity and *pncA* mutations in *Mycobacterium tuberculosis* isolates in Taiwan. *Antimicrob.Agents Chemother.* **47**:3672-3673.
4. **Mphahlele, M., H. Syre, H. Valvatne, R. Stavrum, T. Mannsaker, T. Muthivhi, K. Weyer, P. B. Fourie, and H. M. Grewal.** 2008. Pyrazinamide resistance among South African multidrug-resistant *Mycobacterium tuberculosis* isolates. *J.Clin.Microbiol.* **46**:3459-3464.
5. **Jnawali, H. N., S. C. Hwang, Y. K. Park, H. Kim, Y. S. Lee, G. T. Chung, K. H. Choe, and S. Ryoo.** 2013. Characterization of mutations in multi- and extensive drug resistance among strains of *Mycobacterium tuberculosis* clinical isolates in Republic of Korea. *Diagn.Microbiol.Infect.Dis.* **76**:187-196.
